# Supplementary material for: Enhancement of p-xylene selectivity in the reaction between 2,5-dimethylfuran and ethanol over an ammonium fluoride-modified ZSM-5 zeolite
Source: Royal Society of Chemistry journal article supplement (doi:10.1039/d1cy01793d), 2022-01-01
Supplement: d1cy01793d1.pdf [file d1cy01793d1.pdf]

## Supplementary Information

# Enhancement of *p*-Xylene Selectivity in the Reaction between 2,5-Dimethylfuran and Ethanol over Ammonium Fluoride Modified ZSM-5 Zeolite

Rongrong Zhao,<sup>\*a</sup> Shikun Li,<sup>b</sup> Lixin Bi,<sup>a</sup> Qiang Fu,<sup>a</sup> Hongzi Tan,<sup>a</sup> Ming Wang,<sup>a</sup> and Hongyou Cui<sup>a</sup>

[a] *School of Chemical Engineering, Shandong University of Technology, 255091 Zibo, China*

[b] *Institute of Applied and Physical Chemistry, Faculty 02, University of Bremen, 28359 Bremen, Germany*

\*Corresponding author E-mail: rrzhaol990@sdut.edu.cn (R.Zhao)

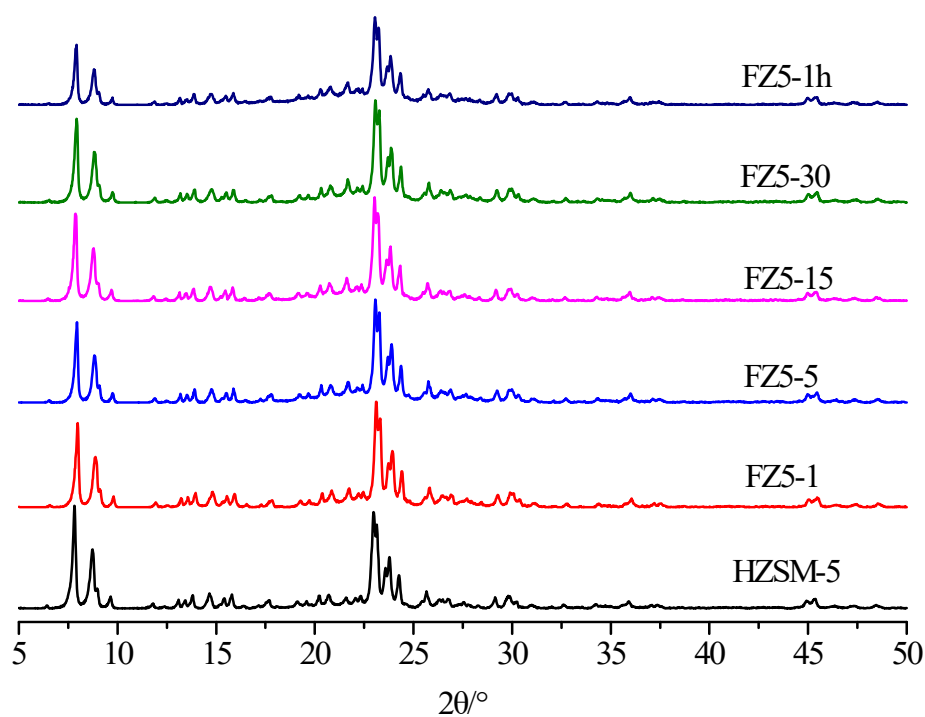

Figure S1 XRD patterns of various samples

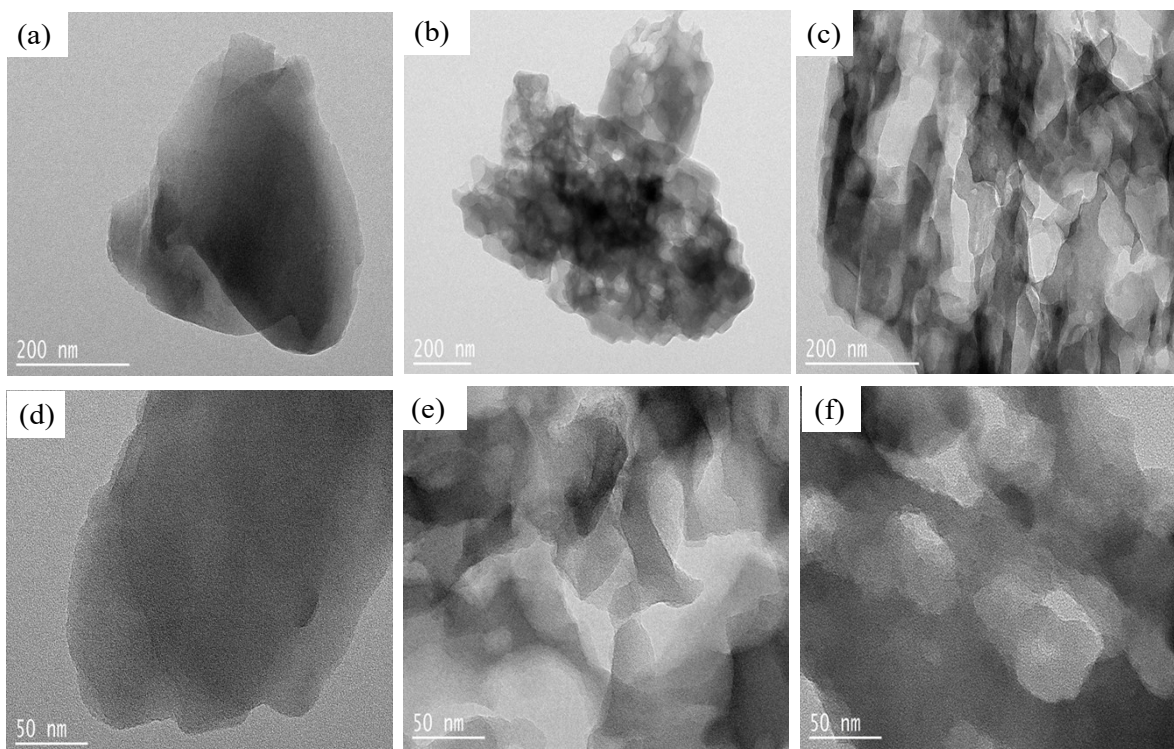

Figure S2 TEM images of various catalysts (a) HZSM-5, (b) FZ5-5, (c) FZ5-15

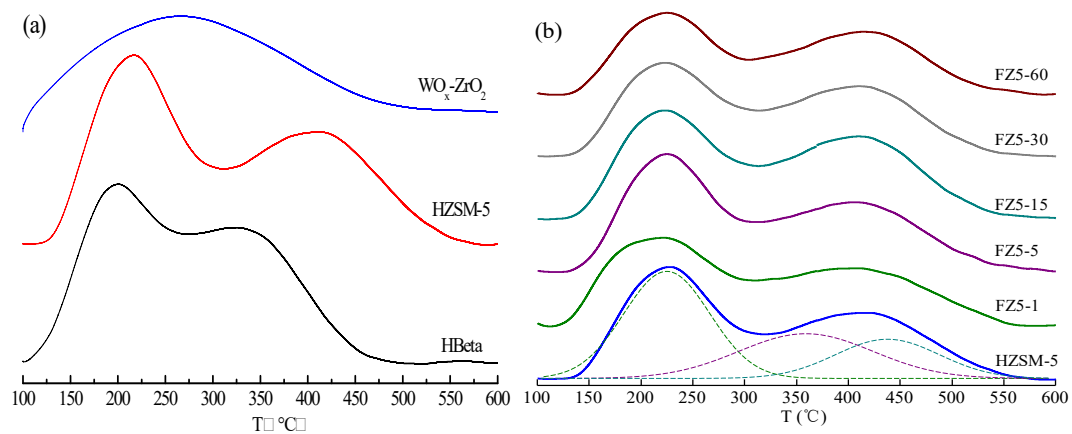

Figure S3  $\text{NH}_3$ -TPD profiles of various catalyst (a) and HZSM-5 zeolite by  $\text{NH}_4\text{F}$  treatment (b)

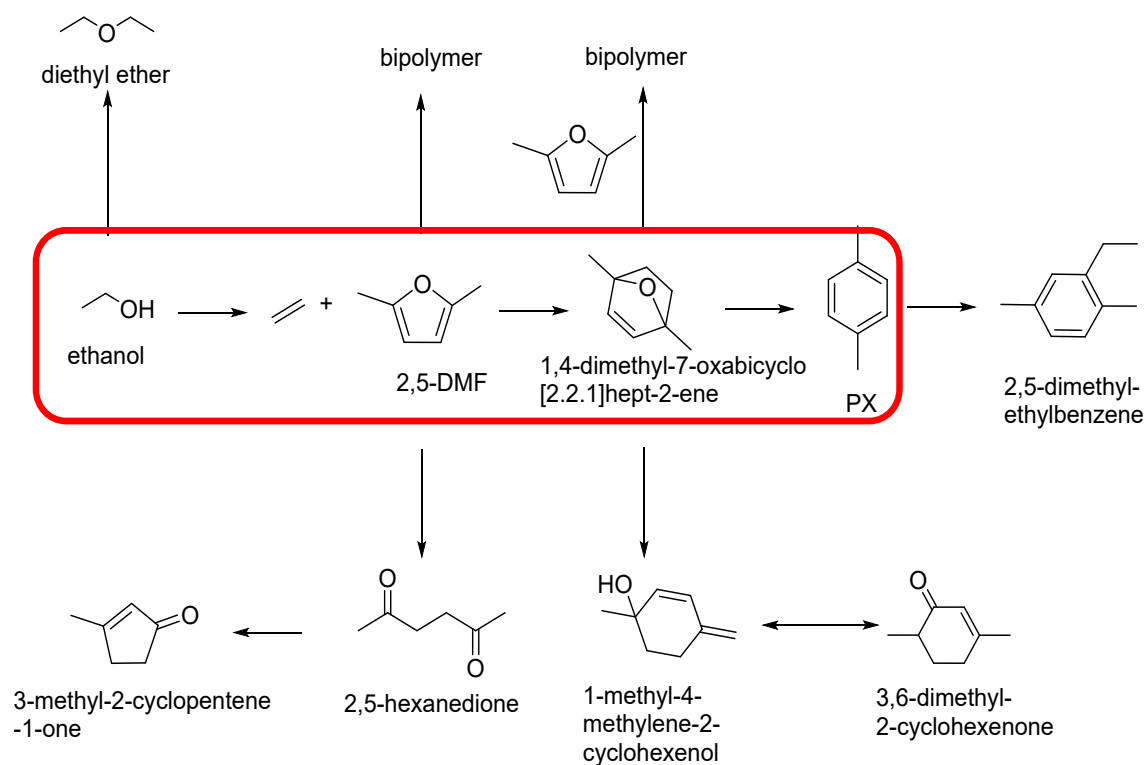

Scheme S1 Reaction network between 2,5-DMF and ethanol

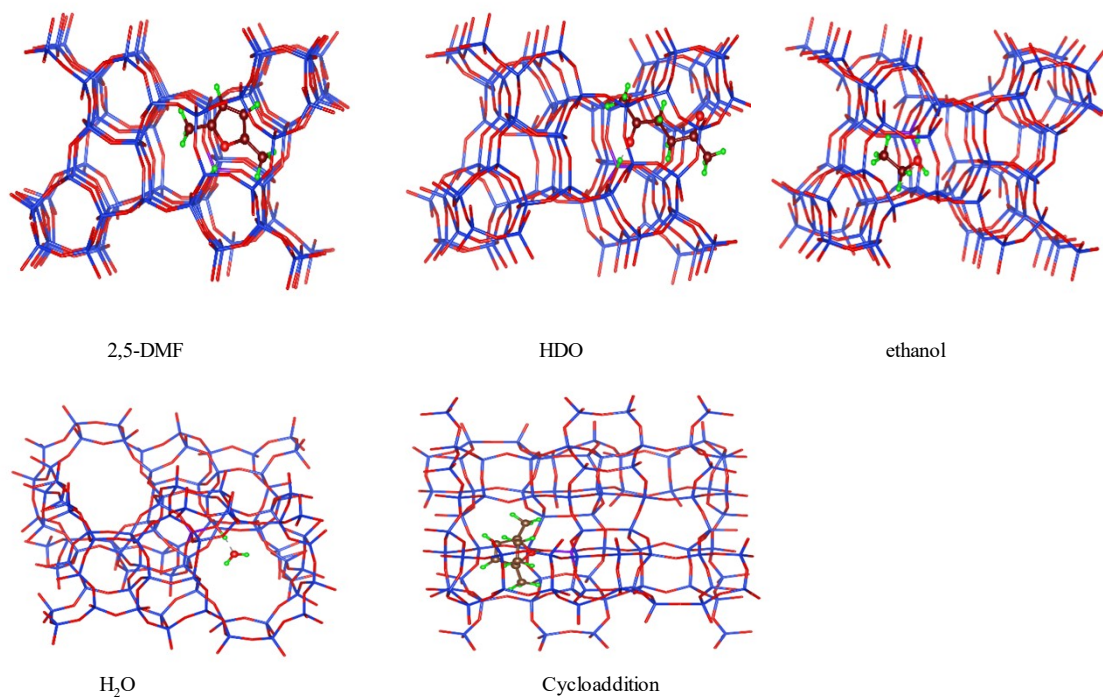

Figure S4 Optimized structure of reactants and products adsorbed in the pores of ZSM-5. C, O, Si, Al and H atoms are depicted as brown, red, blue, purple and green.

Table S1 Adsorption energies of several molecules on the acidic site of ZSM-5 zeolite

| Adsorption energy | kJ/mol  |
|-------------------|---------|
| MCO               | 111.873 |
| ethanol           | 88.9124 |
| H <sub>2</sub> O  | 83.942  |
| 2,5-HDO           | 79.9205 |
| cycloaddition     | 0.94843 |
| DMF               | -2.7    |

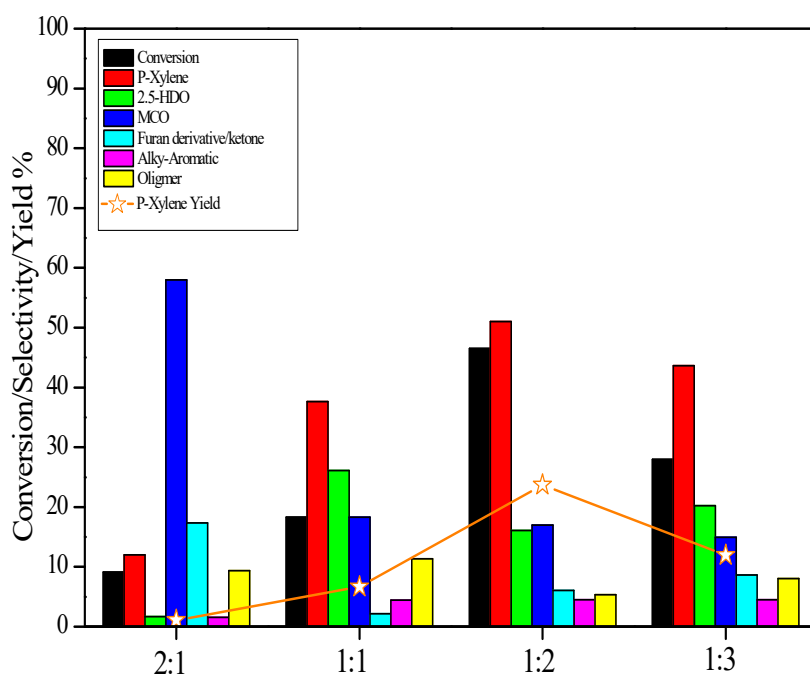

Figure S5 Catalytic performance for DMF reaction with ethanol over HBeta zeolite with different molar ratios DMF/ethanol. Reaction conditions: 3.75M reactant (DMF+ethanol) in heptane; temperature 300 °C; reaction time 12 h; 0.4 g catalyst.

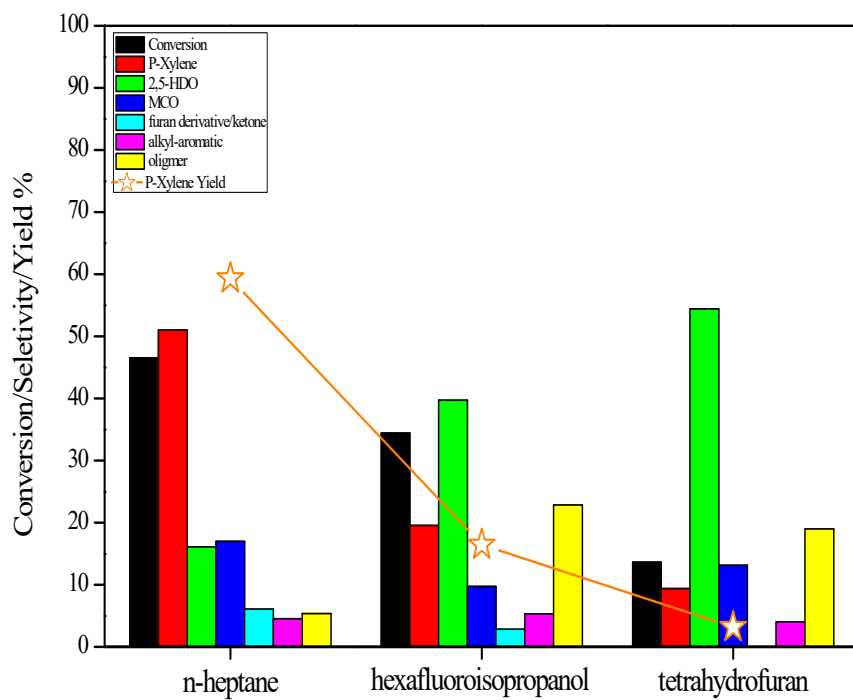

Figure S6 Catalytic performance for DMF reaction with ethanol over HBeta zeolite under various solvents. Reaction conditions: 3.75M reactant (DMF+ethanol) in solvent; temperature 300 °C; reaction time 12 h; 0.4 g catalyst.
